# Supplementary material for: Genetic Divergence and Relationship Among Opisthopappus Species Identified by Development of EST-SSR Markers
Source: PubMed Central journal article supplement (PMC7065708; doi:10.3389/fgene.2020.00177), 2020-02-28
Supplement: Image_1.pdf [file Image_1.pdf]

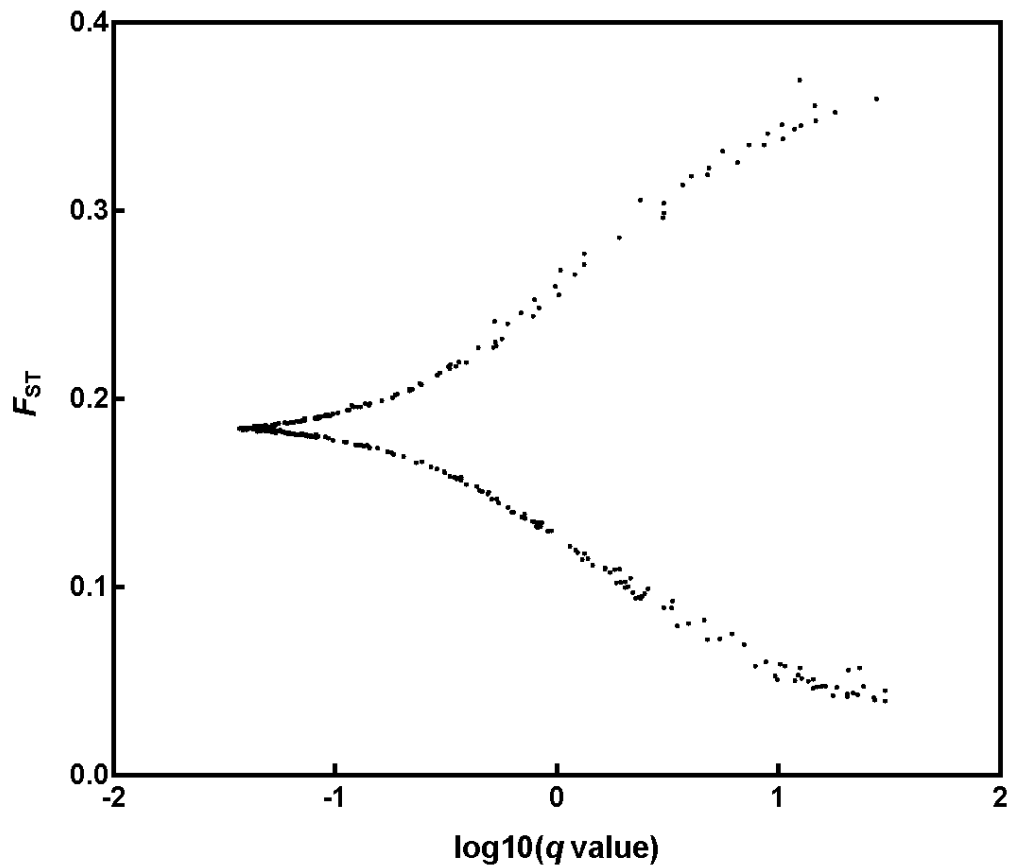

Figure S1 Neutrality tests for examining the  $F_{ST}$  distribution of microsatellite loci by the BayeScan approach.

The analysis shows that none of the remained alleles have extremely high (positive outlier) or low (negative outlier)  $F_{ST}$ , suggesting all alleles used in identifying species *O. longilobus* and *O. taihangensis* are neutral.
